# Supplementary material for: Defective MnO2 nanosheets based free-standing and high mass loading electrodes for high energy density aqueous zinc ion batteries
Source: Royal Society of Chemistry journal article supplement (doi:10.1039/d1qm00998b), 2021-01-01
Supplement: d1qm00998b1.pdf [file d1qm00998b1.pdf]

## Electronic Supplementary Information

### **Defective MnO<sub>2</sub> nanosheets based free-standing and high mass loading electrodes for high energy density aqueous zinc ion batteries**

Ping Shang,<sup>a</sup> Yuanhao Liu,<sup>a</sup> Yingying Mei,<sup>a</sup> Lisha Wu <sup>a</sup> and Yanfeng Dong <sup>\*ab</sup>

<sup>a</sup> *Department of Chemistry, College of Sciences, Northeastern University, Shenyang 110819, Liaoning, China.*

<sup>b</sup> *State Key Lab of Fine Chemicals, Dalian University of Technology, Dalian 116024, Liaoning, China.*

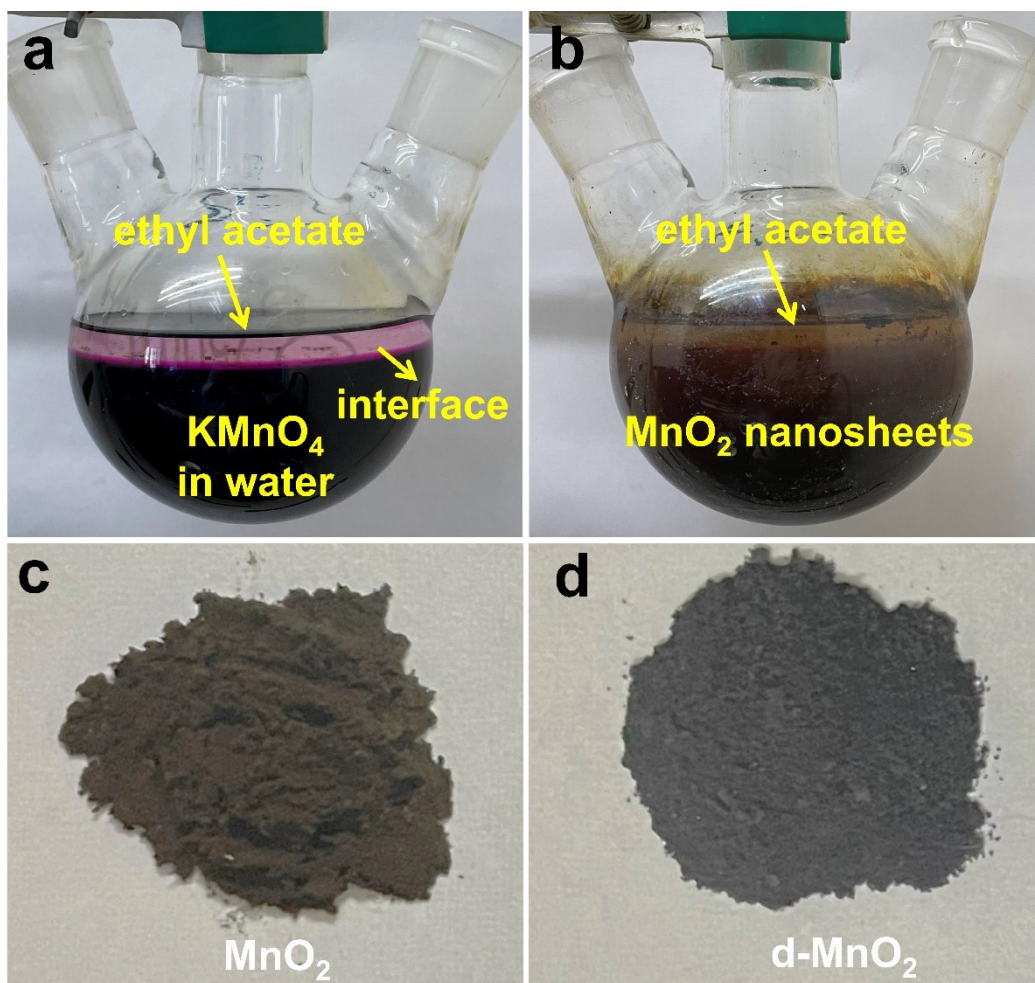

**Fig. S1.** Digital photos of the round-bottom flask (a) before and (b) after interfacial reaction between KMnO<sub>4</sub> and ethyl acetate. Digital photos of (c) the as-prepared MnO<sub>2</sub> and (d) d-MnO<sub>2</sub> products.

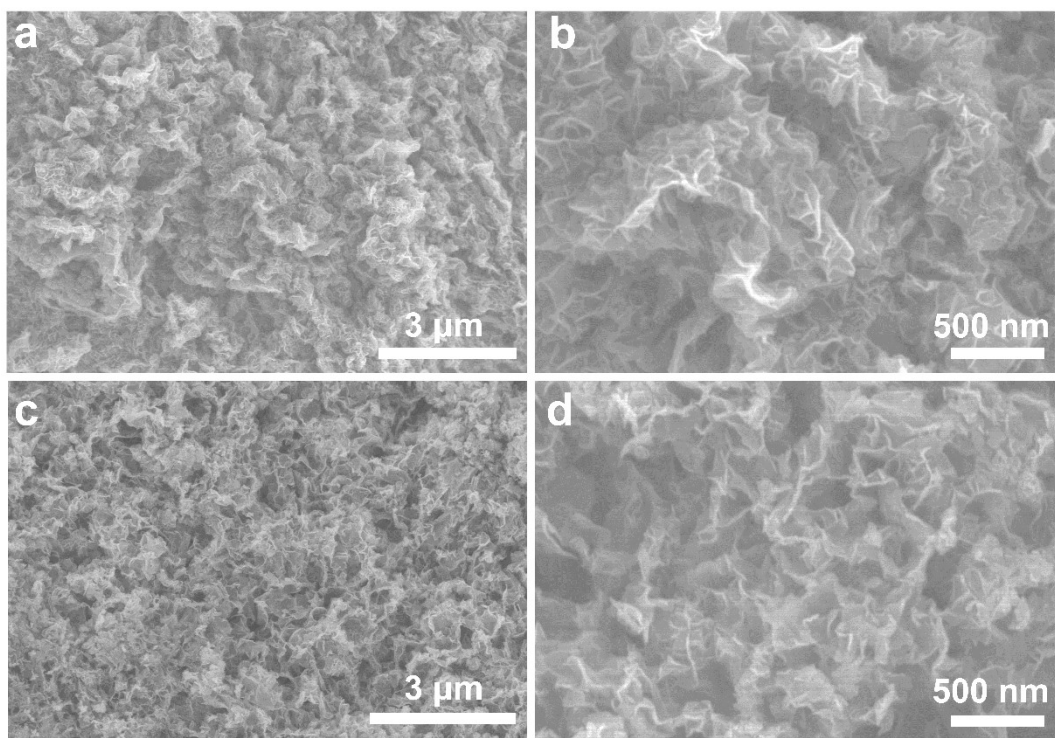

**Fig. S2.** (a, c) Low-magnification and (b, d) high-magnification SEM images of (a, b) MnO<sub>2</sub> nanosheets and (c, d) d-MnO<sub>2</sub> nanosheets.

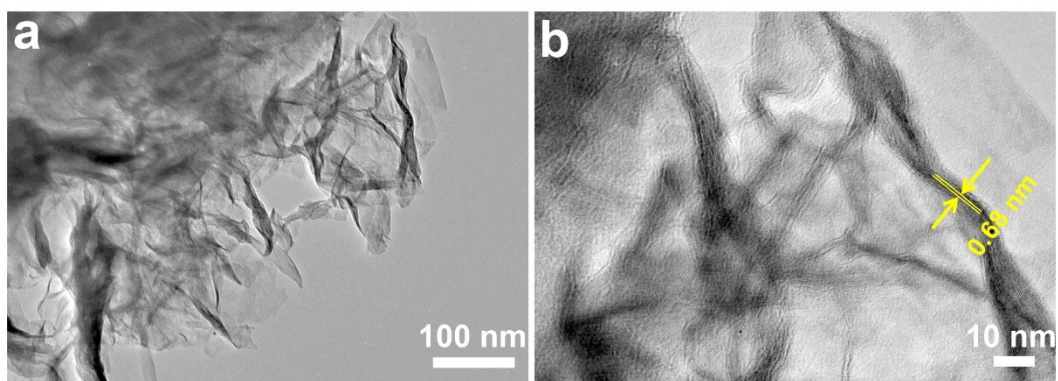

**Fig. S3.** (a) TEM and (b) HRTEM images of MnO<sub>2</sub> nanosheets.

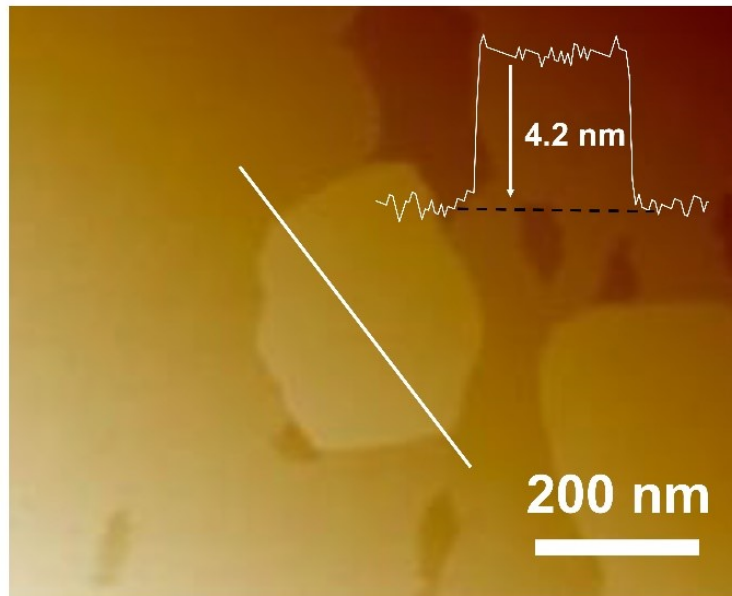

**Fig. S4.** AFM analysis of d-MnO<sub>2</sub> nanosheets.

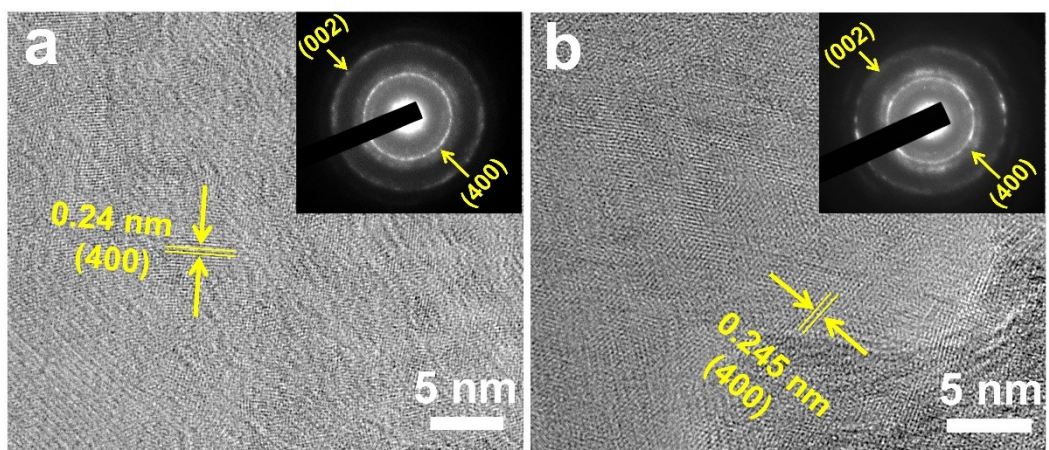

**Fig. S5.** HRTEM images of (a) MnO<sub>2</sub> and (b) d-MnO<sub>2</sub> with SAED analysis (inset).

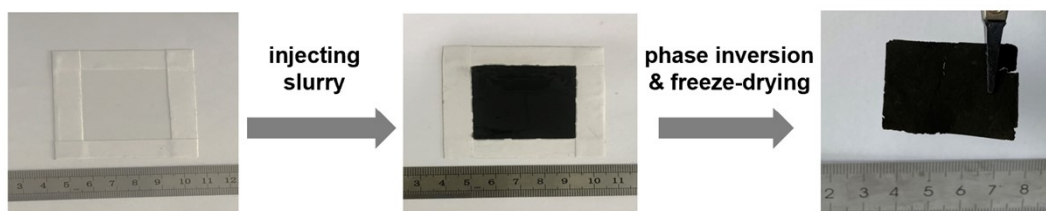

**Fig. S6.** A illustration to show the fabrication process of a H-d-MnO<sub>2</sub> film.

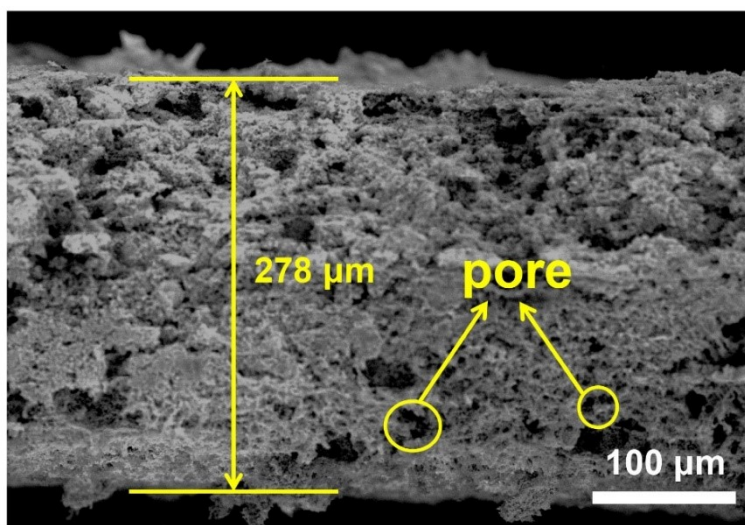

**Fig. S7.** Cross-section SEM image of a H-d-MnO<sub>2</sub> film electrode with a d-MnO<sub>2</sub> loading of 10 mg cm<sup>-2</sup>.



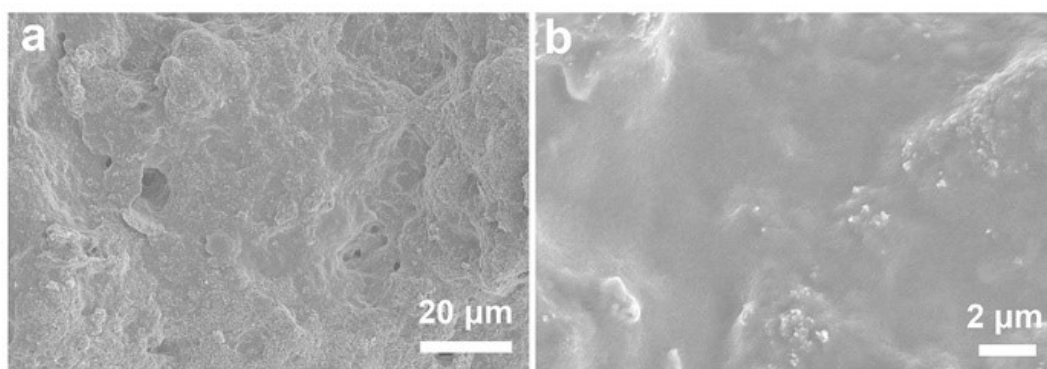

**Fig. S8.** (a) Low-magnificent and (b) high-magnificent SEM images of d-MnO<sub>2</sub>@Ti electrodes.

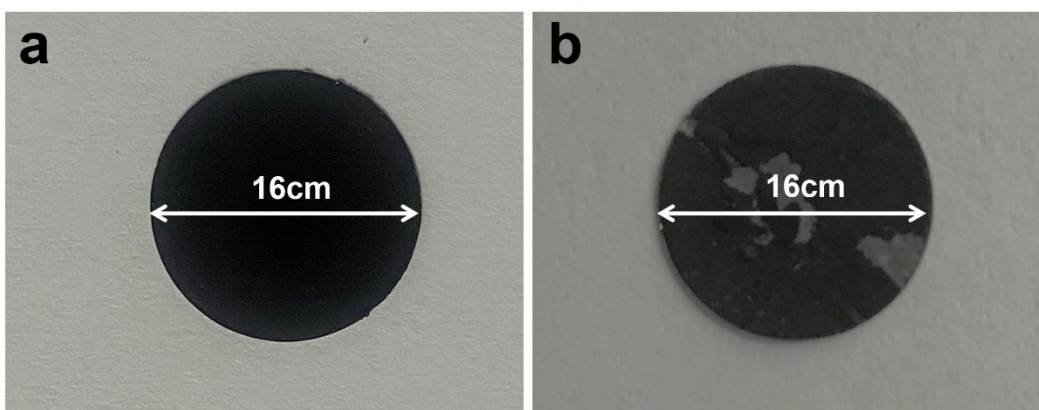

**Fig. S9.** Digital photos of d-MnO<sub>2</sub>@Ti with d-MnO<sub>2</sub> loading of (a) 3.4 mg cm<sup>-2</sup> and (b) 5 mg cm<sup>-2</sup>.

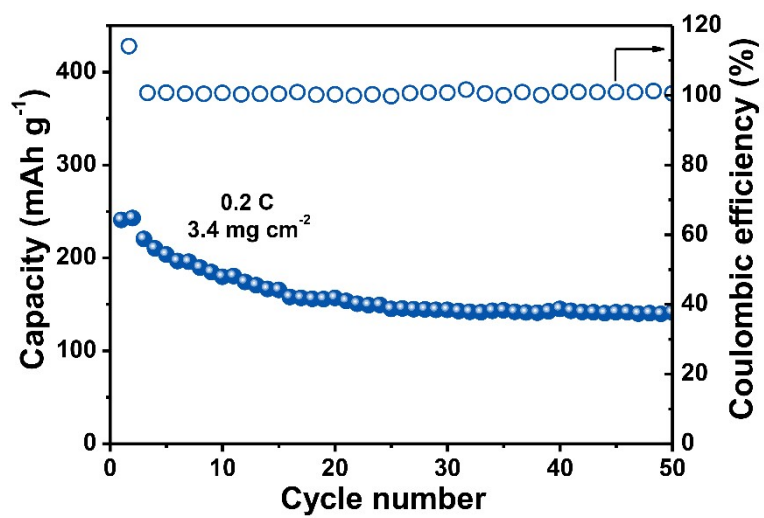

**Fig. S10.** Cycling performance of the d-MnO<sub>2</sub>@CC electrode with a mass loading of ~3.4 mg cm<sup>-2</sup> at 0.2 C.

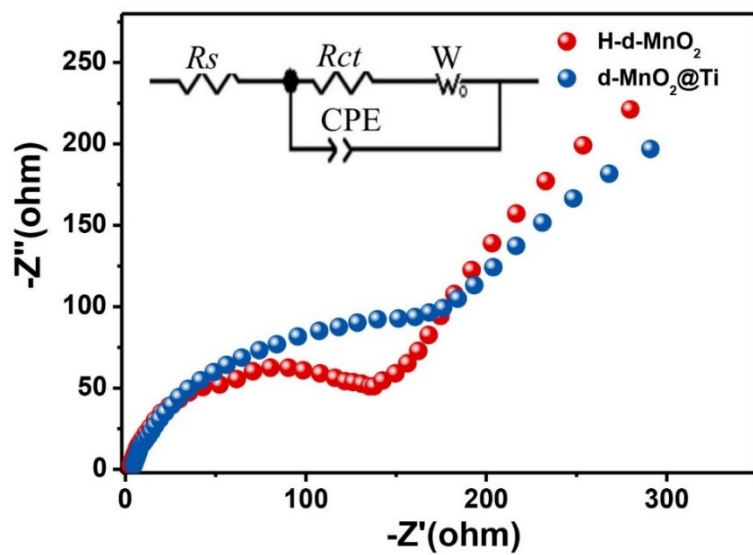

Fig. S11. Nyquist plots of H-d-MnO<sub>2</sub> and d-MnO<sub>2</sub>@Ti electrodes.

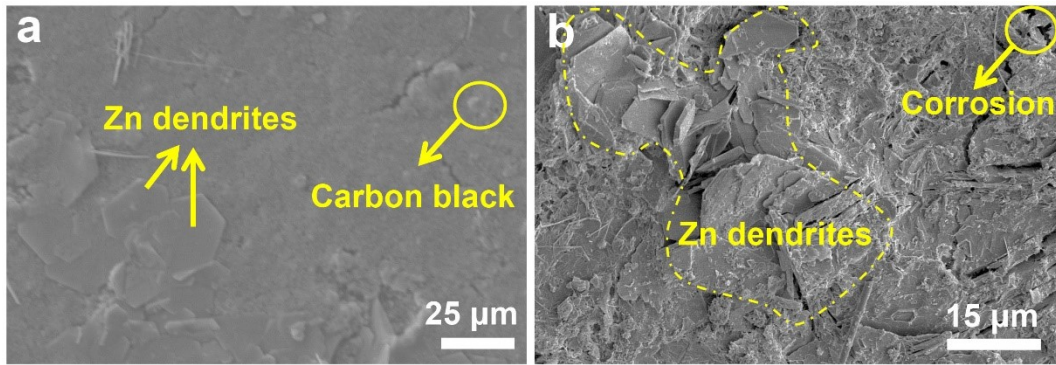

**Fig. S12.** SEM images of (a) a carbon coated Zn foil and (b) bare Zn foil.

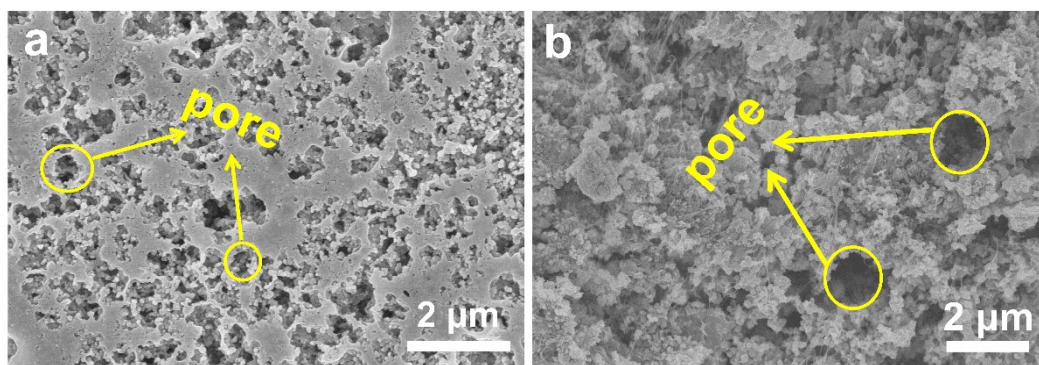

**Fig. S13.** SEM images of H-d-MnO<sub>2</sub> cathode with (a) a low mass loading of 3.4 mg cm<sup>-2</sup> after 100 cycles at 0.2 C and (b) a high mass loading of 10 mg cm<sup>-2</sup> after 50 cycles at 0.1 C.

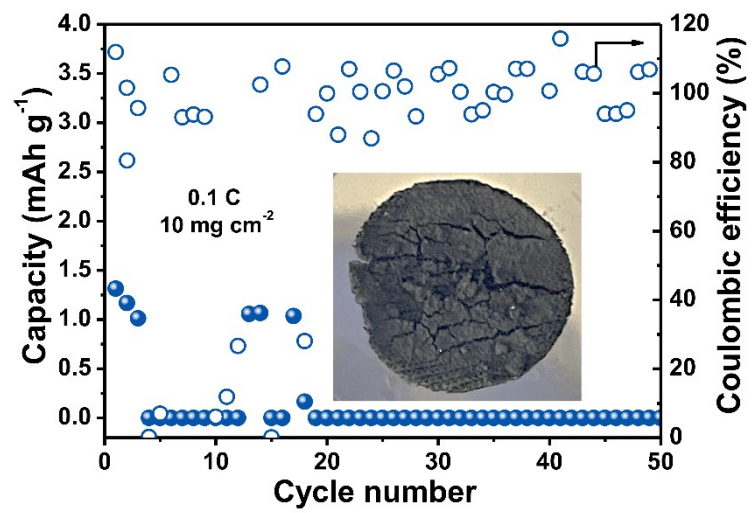

**Fig. S14.** Cycling performance of the d-MnO<sub>2</sub>@carbon cloth electrodes at 0.1 C with a mass loading of ~10 mg cm<sup>-2</sup>.
